# Supplementary material for: Correlation of Leukocyte Telomere Length Measurement Methods in Patients with Dyskeratosis Congenita and in Their Unaffected Relatives
Source: MDPI journal article supplement (doi:10.3390/ijms18081765), 2017-08-13
Supplement: s1 [file s1]

**Supplementary Table S1.** Correlations between qPCR relative telomere length (T/S ratio), Southern blot average telomere length (kilobases) and lymphocyte cell-specific telomere length by flow FISH (kilobases).

| Telomere length measurement method | Disease Status | Cell-Specific Lymphocyte TL by flow FISH |                   |                   |                   |
|------------------------------------|----------------|------------------------------------------|-------------------|-------------------|-------------------|
|                                    |                | CD45+ lymphocytes                        | CD45- lymphocytes | CD20+ lymphocytes | CD57+ lymphocytes |
|                                    |                | R <sup>2</sup>                           |                   |                   |                   |
| qPCR                               | DC             | 0.41                                     | 0.50              | 0.48              | 0.53              |
| Southern Blot                      |                | 0.63                                     | 0.55              | 0.81              | 0.53              |
| qPCR                               | Relatives      | 0.42                                     | 0.33              | 0.53              | 0.20              |
| Southern Blot                      |                | 0.79                                     | 0.61              | 0.73              | 0.55              |
